# Supplementary material for: Chemoradiotherapy screening in a novel biomimetic polymer based pancreatic cancer model
Source: Royal Society of Chemistry journal article supplement (doi:10.1039/c9ra09123h), 2019-01-01
Supplement: c9ra09123h1.pdf [file c9ra09123h1.pdf]

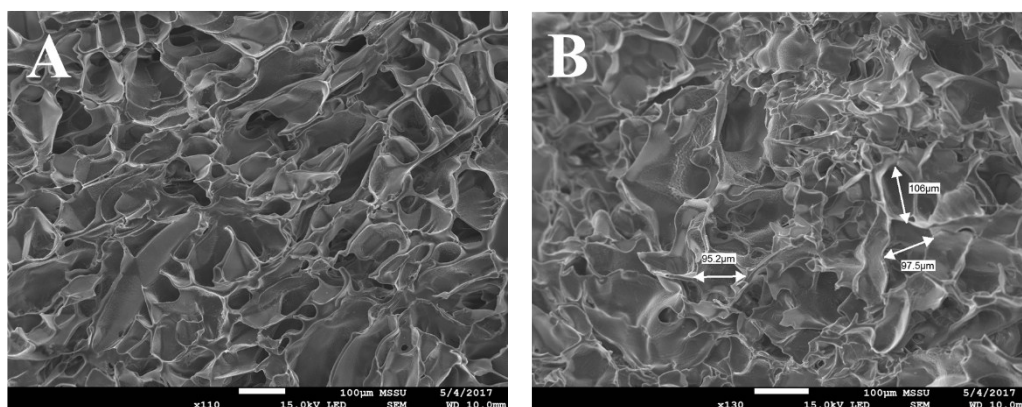

**Figure S1:** Scanning Electron Microscope (SEM) image showing the microstructure and porosity of poly-urethane scaffolds

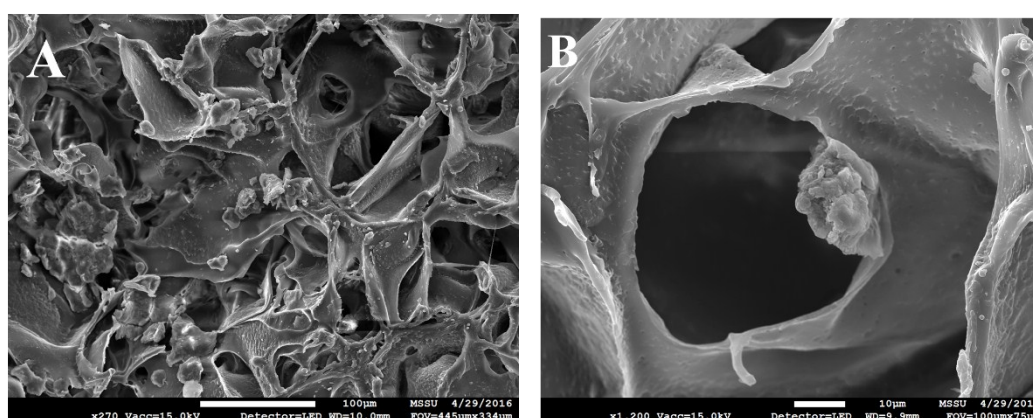

**Figure S2:** Scanning Electron Microscope (SEM) image showing growth and attachment of pancreatic cancer cells (PANC-1) on poly-urethane scaffolds
